# Supplementary material for: Porcine Zygote Injection with Cas9/sgRNA Results in DMD-Modified Pig with Muscle Dystrophy
Source: PubMed Central journal article supplement (PMC5085701; doi:10.3390/ijms17101668), 2016-10-09
Supplement: ijms-17-01668-s001.pdf [file ijms-17-01668-s001.pdf]

# Supplementary Materials: Porcine Zygote Injection with Cas9/sgRNA Results in *DMD*-Modified Pig with Muscle Dystrophy

Hong-Hao Yu, Heng Zhao, Yu-Bo Qing, Wei-Rong Pan, Bao-Yu Jia, Hong-Ye Zhao, Xing-Xu Huang and Hong-Jiang Wei

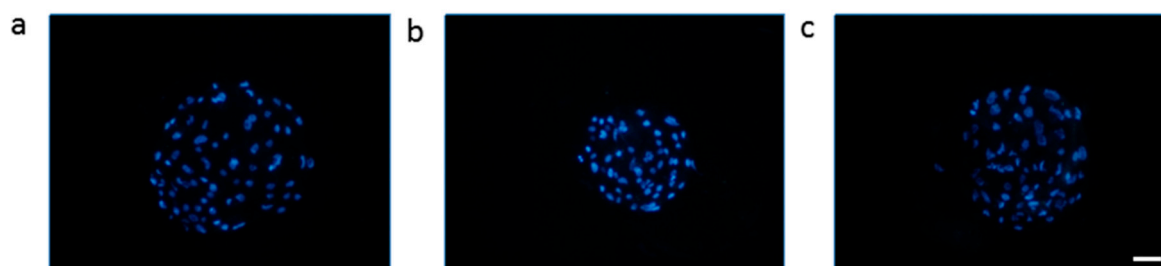

**Figure S1.** Nuclear staining of parthenogenetic blastocysts using Hoechst33342. (a) Representative nuclear staining of Cas9/sgRNA-injected parthenogenetic blastocysts; (b) Representative nuclear staining of H<sub>2</sub>O-injected parthenogenetic blastocysts; (c) Representative nuclear staining of untreated parthenogenetic blastocysts. Scale bar: 100  $\mu$ m.

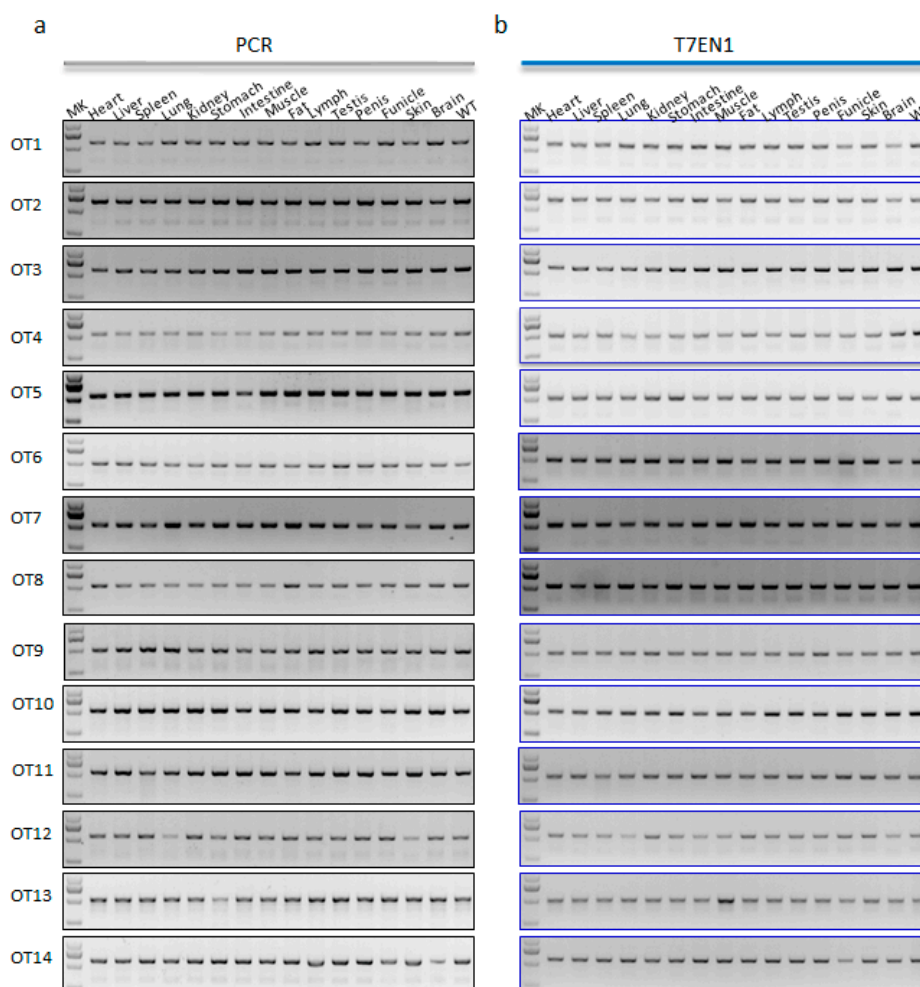

**Figure S2.** Detection of the *DMD* sgRNA:Cas9-mediated off-target in *DMD*-modified pig. (a) PCR products of the off-targeted region of *DMD* amplified from different tissues; (b) Detection of sgRNA:Cas9-mediated off-target cleavage of *DMD* from different tissues by T7EN1 cleavage assay.

**Table S1.** Summary of parthenogenetic embryos microinjected with Cas9 mRNA and sgRNA.

| Group                      | Number of Collected Ovaries | Number of Cultured Cocs | Number of Mature Oocytes | Number of Activation Embryos | Cleavage Rate (%) | Blastocyst Development Rate (%) | Cell Number of Blastocyst Embryo |
|----------------------------|-----------------------------|-------------------------|--------------------------|------------------------------|-------------------|---------------------------------|----------------------------------|
| Cas9/sgRNA injection       | 152                         | 759                     | 455                      | 400                          | 75 (300/400)      | 20 (60/300)                     | 55.5                             |
| H <sub>2</sub> O injection | 113                         | 451                     | 262                      | 240                          | 68 (163/240)      | 17.8 (29/163)                   | 58.7                             |
| Untreated                  | 66                          | 365                     | 230                      | 200                          | 78 (156/200)      | 35.2 (55/156)                   | 57.5                             |

COC, cumulus-oocyte complex.

**Table S2.** Summary of zygotes microinjected with the CRISPR/Cas9 system and embryo transfer.

| Zygote Donor Number | Collected Zygotes Number | Recipient Number of Embryo Transfer | Number of Deliveries | Number of Offspring | DMD Modification Number |
|---------------------|--------------------------|-------------------------------------|----------------------|---------------------|-------------------------|
| 19                  | 98                       | 8                                   | 1                    | 2                   | 1                       |

**Table S3.** Summary of the DMD-sgRNA:Cas9-mediated on-target efficiency (%) in different tissues of founder A.

| Mutation Type      | Heart | Liver | Spleen | Lung | Kidney | Stomach | Intestine | Muscle | Fat | Lymph | Testis | Penis | Funicle | Skin | Brain |
|--------------------|-------|-------|--------|------|--------|---------|-----------|--------|-----|-------|--------|-------|---------|------|-------|
| Mutant 1 (-11)     | 10    | 20    | 10     | 20   | 10     | 0       | 0         | 40     | 10  | 30    | 0      | 0     | 20      | 10   | 30    |
| Mutant 2 (-36)     | 0     | 30    | 20     | 0    | 0      | 40      | 20        | 10     | 10  | 0     | 20     | 30    | 0       | 50   | 20    |
| Mutant 3 (-5,+14)  | 40    | 10    | 10     | 10   | 30     | 20      | 20        | 0      | 0   | 0     | 30     | 30    | 10      | 0    | 30    |
| Mutant 4 (-6, +16) | 0     | 0     | 0      | 0    | 0      | 0       | 0         | 20     | 0   | 0     | 0      | 0     | 0       | 0    | 0     |
| Total              | 50    | 60    | 40     | 30   | 40     | 60      | 40        | 70     | 20  | 30    | 50     | 60    | 30      | 60   | 80    |

**Table S4.** List of putative off-target sites homologous to sgRNA.

|         | 20 | 19 | 18 | 17 | 16 | 15 | 14 | 13 | 12 | 11 | 10 | 9 | 8 | 7 | 6 | 5 | 4 | 3 | 2 | 1 | N | G | G | Chro. | Location  | Strand |
|---------|----|----|----|----|----|----|----|----|----|----|----|---|---|---|---|---|---|---|---|---|---|---|---|-------|-----------|--------|
| DMD sg1 | G  | T  | T  | G  | G  | A  | G  | A  | C  | T  | G  | A | A | G | T | A | A | A | C | C | T | G | G | X     | 31396957  | +      |
| OT1     | G  | T  | G  | G  | G  | A  | G  | A  | G  | G  | G  | A | A | G | T | A | A | A | C | C | T | G | G | 3     | 98663037  | -      |
| OT2     | G  | T  | G  | G  | G  | A  | G  | A  | G  | G  | G  | A | A | G | T | A | A | A | C | C | T | G | G | 3     | 98588326  | -      |
| OT3     | G  | G  | A  | G  | G  | A  | A  | A  | C  | G  | G  | A | A | G | T | A | A | A | C | C | T | G | G | 12    | 36178851  | +      |
| OT4     | C  | T  | T  | G  | G  | T  | G  | C  | C  | T  | C  | A | A | G | T | A | A | A | C | C | A | G | G | 6     | 90817452  | +      |
| OT5     | G  | T  | T  | G  | G  | G  | G  | A  | A  | T  | G  | T | A | G | T | A | A | A | C | C | A | G | G | 1     | 168736398 | +      |
| OT6     | C  | T  | T  | G  | G  | G  | G  | G  | C  | T  | G  | C | A | G | T | A | A | A | C | C | A | G | G | 12    | 36176812  | -      |
| OT7     | G  | C  | T  | G  | G  | A  | G  | A  | C  | T  | G  | A | A | G | A | A | A | A | C | A | T | G | G | 7     | 33407843  | +      |
| OT8     | A  | T  | T  | G  | T  | A  | A  | A  | C  | T  | G  | A | T | G | T | A | A | A | C | C | A | G | G | 16    | 32234398  | -      |
| OT9     | T  | T  | T  | T  | G  | A  | G  | A  | A  | T  | G  | A | A | G | T | A | A | A | T | C | A | G | G | 8     | 101105802 | -      |
| OT10    | T  | T  | T  | G  | G  | A  | G  | G  | C  | T  | G  | C | A | G | T | A | G | A | C | C | A | G | G | X     | 3173939   | -      |
| OT11    | G  | T  | T  | G  | C  | T  | G  | A  | C  | T  | G  | A | A | G | T | T | A | A | C | C | C | G | G | 1     | 241128345 | -      |
| OT12    | G  | T  | C  | A  | G  | A  | G  | A  | C  | A  | G  | A | A | G | T | A | A | T | C | C | T | G | G | 9     | 9959203   | +      |
| OT13    | G  | T  | C  | A  | G  | A  | G  | A  | C  | A  | G  | A | A | G | T | A | A | T | C | C | T | G | G | 9     | 9782547   | +      |
| OT14    | T  | T  | T  | T  | G  | A  | G  | G  | C  | T  | G  | A | A | G | T | G | A | A | C | C | G | G | G | 6     | 47144948  | +      |

PAM is shaded in green; Bases different to sgRNA are shaded in red.

**Table S5.** Oligonucleotides for generating sgRNA expression vector.

| Oligonucleotides        | Sequence                       |
|-------------------------|--------------------------------|
| DMD-sgRNA top strand    | 5'-TAGGGTTGGAGACTGAAGTAAACC-3' |
| DMD-sgRNA bottom strand | 5'-AAACGGTTTACTTCAGTCTCCAAC-3' |

**Table S6.** Primers for genotyping and amplifying the Cas9/sgRNA targeted fragment.

| Name     | Sequence                    | Amplicon |
|----------|-----------------------------|----------|
| pDMD For | 5'-GAAGGCTTATTATTGTATGTG-3' | 531      |
| pDMD Rev | 5'-TCAAGAGTTATTCTCCAAAGG-3' |          |

**Table S7.** Sequences of primers for PCR amplification of the off-target sites.

| Name     | Sequence                          | Amplicon |
|----------|-----------------------------------|----------|
| OT1 For  | 5'-TAGGTAAGGTGAGGCACAGTAAAC-3'    | 578      |
| OT1 Rev  | 5'-AACAGCACTAACAGAACTGATCGAC-3'   |          |
| OT2 For  | 5'-AACGAATTCGACTAGGAACTCTGAG-3'   | 636      |
| OT2 Rev  | 5'-TATTCAAAGATGTGTGAGGAGGAGC-3'   |          |
| OT3 For  | 5'-TTCTTTCTGCGTTCTATGCTTGCTG-3'   | 556      |
| OT3 Rev  | 5'-CTTCTGGACAGTTTATTTGAGGAGG-3'   |          |
| OT4 For  | 5'-ACACATCTCCAAGTTTCGGTCTCTG-3'   | 515      |
| OT4 Rev  | 5'-CTGGTTATGAGTCTCTGTCTCTTAG-3'   |          |
| OT5 For  | 5'-TCCTTTGTGCTATATGCTAGACTCC-3'   | 525      |
| OT5 Rev  | 5'-ATACAAATCCCCAAAGAAGCAACAG-3'   |          |
| OT6 For  | 5'-GGCTCTGGAGAAAGCTACTGCAC-3'     | 475      |
| OT6 Rev  | 5'-TTGGATCTGGCTGTTTCCTGGTC-3'     |          |
| OT7 For  | 5'-CTGTGACAGATGGACTCTAGAAATG-3'   | 536      |
| OT7 Rev  | 5'-ATAGTGGGTTAAGGATCTGGCATTG-3'   |          |
| OT8 For  | 5'-TGAGAATCATAAAACATCAGGTCCG-3'   | 510      |
| OT8 Rev  | 5'-CTCTCTTCTGAACTGATTCTAGGTG-3'   |          |
| OT9 For  | 5'-AATACAGGTGACAACAACACTCAAGAC-3' | 496      |
| OT9 Rev  | 5'-TAATTGGCTTATACATTCATGGGTG-3'   |          |
| OT10 For | 5'-CCTTGAGATTTCCAGCATAAGACAC-3'   | 511      |
| OT10 Rev | 5'-ACCCCGCTTCTTCATTAAGTTCTAG-3'   |          |
| OT11 For | 5'-ACAGATAGGGTCATCCATTTTCAAG-3'   | 534      |
| OT11 Rev | 5'-TACATTCAGGATCTCTGCTTTGCTC-3'   |          |
| OT12 For | 5'-AAAAAGCAAGTGTCCGCAGATTCAG-3'   | 541      |
| OT12 Rev | 5'-TTATGAGATTCACATGAAGGCAGCC-3'   |          |
| OT13 For | 5'-TCTGTGCTCGCAACTTGGTTCTCTC-3'   | 508      |
| OT13 Rev | 5'-CTTTCAACGACGACAAGGCAGATTC-3'   |          |
| OT14 For | 5'-CAGTTTCCTCAGGTCTCAGCTATTG-3'   | 584      |
| OT14 Rev | 5'-TCTGTCCTCTCGCTTACTTGTGTC-3'    |          |
